# Supplementary material for: Effects of the Hubbard U correction on the electronic and magnetic properties of the tetragonal V2P2 sheet
Source: Royal Society of Chemistry journal article supplement (doi:10.1039/d1ra07558f), 2021-01-01
Supplement: d1ra07558f1.pdf [file d1ra07558f1.pdf]

## Effects of the Hubbard U correction on the electronic and magnetic properties of tetragonal $V_2P_2$ sheet

Yusuf Zuntu Abdullahi<sup>a1</sup>, Sohail Ahmad<sup>b</sup> Abdullahi Abdu Ibrahim<sup>c</sup>

<sup>a</sup>Department of Physics, Faculty of Science, Kaduna State University, P.M.B. 2339 Kaduna State, Nigeria.

<sup>b</sup>Department of Physics, College of Science, P O Box 9004, King Khalid University, Abha, Saudi Arabia.

<sup>c</sup>Computer Engineering Department, Altinbas University, Istanbul, Turkey.

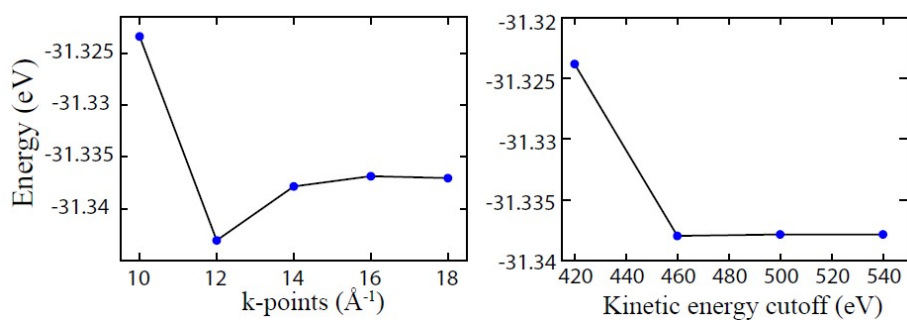

**Fig. S1** Total energy of  $V_2P_2$  sheet as function of Monkhorst-pack (Left) and wave function cutoffs (Right).

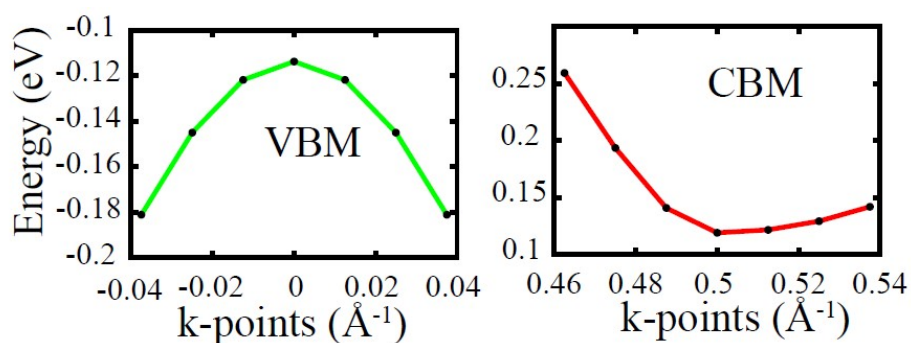

**Fig. S2** The E-k points closed to the CBM and VBM plots for  $V_2P_2$  sheet.

<sup>1</sup>Corresponding author.

Email address: [yusufzuntu@gmail.com](mailto:yusufzuntu@gmail.com)

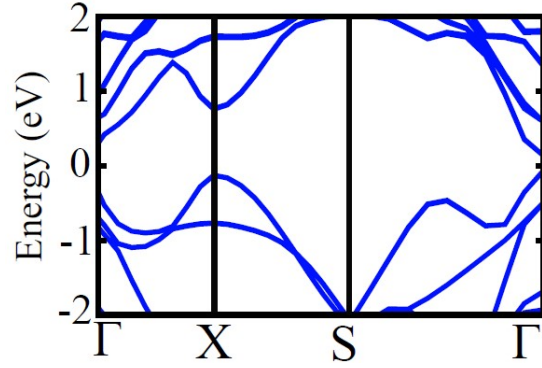

**Fig. S3.** The electronic band structure using the HSE functional for  $t\text{-}V_2P_2$  sheet.

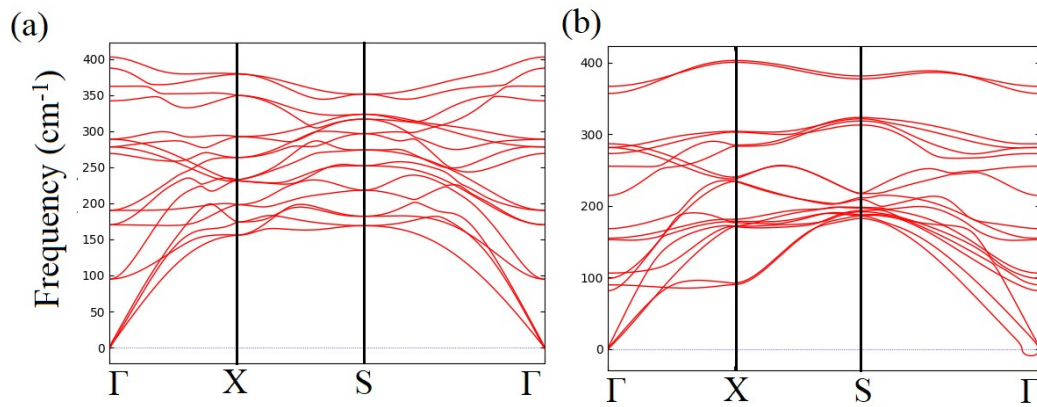

**Fig. S4.** The phonon dispersions curves obtained using the (a) PBE and (b) PBE+U for  $t\text{-}V_2P_2$  sheet

**Table S1** The atomic positions and lattice constant for the tetragonal  $V_2P_2$  sheet.

| System       | L (Å)                       | Atomic positions |              |              |              |
|--------------|-----------------------------|------------------|--------------|--------------|--------------|
| <b>PBE</b>   | $a = b = 3.160 \text{ \AA}$ | V                | -0.004719727 | 1.576723644  | 12.119697907 |
|              |                             | V                | 1.576723022  | -0.004719159 | 13.727120004 |
|              |                             | P                | -0.004134114 | 1.576138120  | 14.611705249 |
|              |                             | P                | 1.576138501  | -0.004134923 | 11.235097521 |
| <b>PBE+U</b> | $a = b = 3.360 \text{ \AA}$ | V                | 0.012684338  | 1.692784585  | 6.511549618  |
|              |                             | V                | 1.692784599  | 0.012685324  | 8.488466319  |
|              |                             | P                | 0.012602591  | 1.692851786  | 9.193939943  |
|              |                             | P                | 1.692850606  | 0.012603159  | 5.806043166  |

**Table S2** The atomic positions and lattice constant for the orthorhombic  $V_2P_2$  sheet.

| System     | L (Å)                   | Atomic positions |             |             |             |
|------------|-------------------------|------------------|-------------|-------------|-------------|
| <b>PBE</b> | $a = 3.886 \text{ \AA}$ | V                | 1.942844987 | 0.000129200 | 7.986247063 |
|            | $b = 2.815 \text{ \AA}$ | V                | 3.885580301 | 2.815611839 | 9.484710693 |

|  |  |   |             |             |              |
|--|--|---|-------------|-------------|--------------|
|  |  | P | 0.000040889 | 1.407861710 | 7.409172058  |
|  |  | P | 1.942767501 | 1.407879472 | 10.061764717 |

**Table S3:** Relative energies (eV) between orthorhombic ( $E_O$ ) and tetragonal ( $E_T$ )  $V_2P_2$  sheet.

| Sheet    | $E_T - E_T$ | $E_O - E_T$ |
|----------|-------------|-------------|
| $V_2P_2$ | 0           | 0.911       |

**Table S4:** The calculated carrier effective mass ( $m^*$ ) for tetragonal  $V_2P_2$  sheet.

| Sheet    | Carrier | $m^*/m_0$ |
|----------|---------|-----------|
| $V_2P_2$ | $h$     | 3.162     |
|          | $e$     | 2.656     |

**Table S5.** Geometry and electronic structure for  $V_2P_2$  with adsorbed Li, Na, K, Ge, and Si atoms. The favorable adsorption site (Ads. Site) for Li, Na, K, Ge, and Si atoms on the  $T_V$ ,  $T_V$ ,  $T_V$ ,  $T_H$  and  $T_H$  sites respectively.  $T_V$  and  $T_H$  represent top of the V atom and hollow sites on (2x2) supercell of the  $V_2P_2$  sheet.  $X$  refers to an adsorbate species.  $E_{ads}$ ,  $d_{V_2P_2-X}$  refer to adsorption energy and averaged bond length between  $V_2P_2$  sheet and the adsorbates.  $M_{cell}$  stands for magnetic moment per unit cell.  $EC$  refers to the electronic character of the  $V_2P_2$  with adsorbates. In the present systems, the  $EC$  is found to be metallic (M).

| System | Ads. Site | $E_{ads}$<br>(eV) | $d_{V_2P_2-X}$<br>(Å) | $M_{cell}$<br>( $\mu_B$ ) | $EC$  |
|--------|-----------|-------------------|-----------------------|---------------------------|-------|
| Li     | $T_V$     | 2.40              | 2.51                  | 0.50                      | Metal |
| Na     | $T_V$     | 1.87              | 2.84                  | 1.00                      | -     |
| K      | $T_V$     | 1.94              | 3.23                  | 1.00                      | -     |
| Ge     | $T_H$     | 3.53              | 2.35                  | 0.00                      | -     |
| Si     | $T_H$     | 4.02              | 2.24                  | 0.00                      | -     |
